# Supplementary material for: Pearl millet response to drought: A review
Source: Front Plant Sci. 2023 Feb 10;14:1059574. doi: 10.3389/fpls.2023.1059574 (PMC9955113; doi:10.3389/fpls.2023.1059574)
Supplement: Supplementary file 1 [file Table_1.xlsx]

## Sheet: Table S1
Table S1: Summary of QTLs identified associated with yield component traits during drought stress caused at various stages of growth period across the seven linkage groups from various studies. (VPD* Vapor Pressure Deficit)
Population	Method of markers generation	Stage of Drought application	Traits	Linkage group and candidate gene	References
H77/833-2 X PRLT2/89-33,	RFLP	Terminal drought stress (40 DAS)	Grain yield	LG2 (32%), LG5 (14%)	Yadav et al. 2002
			Harvest Index	LG2 and LG 6
			Flowering time	LG2, LG3, LG4 and LG6
			Biomass production	LG2
			Stover Yield	LG2 and LG6
ICML IS 11001-11215, SL 1-5, Souna 3 and ICMB88004	GBS	Early drought stress (21 DAS)	Biomass production	Chr 3 (19%)	Debieu et al. 2018
				Chr 2 (14%)
				Chr 6 (14%)
PLRT 2/89-33 and H 77/833-2	RFLP	50% flowering	Flowering time	LG2, LG4 and LG6 (60-70%)	Yadav et al. 2004
			Panicle harvest index	LG1, LG5, and LG7
			Stover Yield	LG2
			Harvest index	LG2 and LG6
			Grain Yield	LG1, LG2, LG5 and LG7
ICMB 841 × 863B	RFLP		Grain yield	LG2, LG3 and LG4	Bidinger et al. 2007
			Grain number	LG1 (34%)
			Individual Grain Mass	LG1 and LG3
			Panicle Harvest Index	LG1
ICMB 841 × 863B	RFLP	~25 DAS	Transpiration rate under low VPD	LG3 (12.9%)	Aparna et al. 2015
			Transpiration rate under high VPD	LG1, LG2, LG4 and LG6 (major)
			Transpiration under low VPD	LG6 (24.5%) and LG7 (24.7%)
			Transpiration under high VPD	LG1, LG2, LG5, LG6 and LG7
PLRT 2/89-33 and H 77/833-2	SSR and DaRT markers	Vegetative seedling stage	Biomass production	LG1, LG2, LG4, LG6 and LG7	Kholova et al. 2012
			Transpiration rate under low VDP	LG2, LG3 and LG7

## Sheet: Table S2
Table S2: The detail of 94 shared genes from transcriptomics data along with Gene ID of Arabidopsis and accession number from pearl millet. The table also give information of GO terms and gene description for each 94 genes.
TAIR Gene ID	PM Genome accession ID	RD_40_A ContigID	VD_J ContigID	TAIR Gene ID	DIRECTION	Blast e-value	GOID	Gene ontology	Gene description
AT1G65540	Pgl_GLEAN_10008908	XP_004953049.1	XP_004961899.1	AT1G65540	downregulate	0	GO:0006875	Cellular metal ion homeostasis	LETM1-like protein;(source:Araport11)	LEUCINE ZIPPER-EF-HAND-CONTAINING TRANSMEMBRANE PROTEIN 2 (LETM2)
AT3G47570	Pgl_GLEAN_10025781	XP_004955074.1	XP_008678804.1	AT3G47570	upregulate	0	GO:0016301	Kinase activity	Leucine-rich repeat protein kinase family protein;(source:Araport11)
AT1G02170	Pgl_GLEAN_10021786	XP_004984160.1	XP_004986799.1	AT1G02170	upregulate	0	GO:0043068	positive regulation of programmed cell death	Encodes a type I metacaspase. Two Arabidopsis metacaspases, AT1G02170 (MC1) and AT4G25110 (MC2) antagonistically control programmed cell death in Arabidopsis. MC1 is a positive regulator of cell death and requires conserved caspase-like putative catalytic residues for its function. MC2 negatively regulates cell death. This function is independent of the putative catalytic residues. A third type I…	METACASPASE 1 (MC1)
AT3G46530	Pgl_GLEAN_10020917	DAA42738.1	XP_004959068.1	AT3G46530	upregulate	3.86e-94	GO:0009626	plant type hypersensitive response	Confers resistance to the biotrophic oomycete, Peronospora parasitica. Encodes an NBS-LRR type R protein with a putative amino-terminal leucine zipper. Fungal protein ATR13 induces RPP13 gene expression and disease resistance. The mRNA is cell-to-cell mobile.	RECOGNITION OF PERONOSPORA PARASITICA 13 (RPP13)
							GO:0006952	defense response
							GO:0098542	defense response to other organism
AT3G26300	Pgl_GLEAN_10034450	XP_002466122.1	XP_002442920.1	AT3G26300	upregulate	1.68e-152	GO:0016709	oxidoreductase activity
AT1G11310	Pgl_GLEAN_10037672	XP_004985865.1	XP_004985865.1	AT1G11310	downregulate	0	GO:0031348	negative regulation of defense response	The expression of several phylogenetically closely-related AtMLO genes showed similar or overlapping tissue specificity and analogous responsiveness to external stimuli, suggesting functional redundancy, co-function, or antagonistic function(s). mlo resistance in A. thaliana does not involve the signaling molecules ethylene, jasmonic acid or salicylic acid, but requires a syntaxin, glycosyl hydro…	MILDEW RESISTANCE LOCUS O 2 (MLO2)
							GO:0009620	response to fungus
AT2G20340	Pgl_GLEAN_10014178	AEE61930.1	XP_004972880.1	AT2G20340	downregulate	0	GO:0009611	response to wounding	Encodes an aromatic aldehyde synthase (AtAAS), which catalyzes the in vitro conversion of phenylalanine and 3,4-dihydroxy-L-phenylalanine to phenylacetaldehyde and dopaldehyde, respectively. The mRNA is cell-to-cell mobile.	AROMATIC ALDEHYDE SYNTHASE (AAS)
AT1G53540	Pgl_GLEAN_10029349	ERL88540.1	AGZ78430.1	AT1G53540	upregulate	1.39e-66	GO:0009408	response to heat	Member of the class I small heat-shock protein (sHSP) family, which accounts for the majority of sHSPs in maturing seeds	HSP17.6C
							GO:0042542	response to hydrogen peroxide
							GO:0009651	response to salt stress
AT3G57520	Pgl_GLEAN_10008593	EAZ03191.1	XP_004955798.1	AT3G57520	downregulate	0	GO:0006979	response to oxidative stress	SIP2 encodes a raffinose-specific alpha-galactosidase that catalyzes the breakdown of raffinose into alpha-galatose and sucrose. This enzyme may function in unloading raffinose from the phloem as part of sink metabolism. Although it was originally predicted to act as a raffinose synthase (RS), that activity was not observed for recombinant SIP2.	SEED IMBIBITION 2 (SIP2)
AT5G25610	Pgl_GLEAN_10010984	NP_001174278.1	NP_001274155.1	AT5G25610	upregulate	2.42e-90	GO:0009269	response to dessictaion	responsive to dehydration 22 (RD22) mediated by ABA	RESPONSIVE TO DESICCATION 22 (RD22)
							GO:0009651	response to salt stress
							GO:0009737	response to abscissic acid
AT2G39770	Pgl_GLEAN_10005886	XP_004490906.1	XP_004970565.1	AT2G39770	downregulate	0	GO:0009753	response to jasmonic acid	Encodes a GDP-mannose pyrophosphorylase/ mannose-1-pyrophosphatase. This enzyme provides GDP-mannose, which is used for cell wall carbohydrate biosynthesis and protein glycosylation as well as for ascorbate (vitamin C) biosynthesis. Mutations in this gene confer hypersensitivity to NH4+.	CYTOKINESIS DEFECTIVE 1 (CYT1)
							GO:0010193	response to ozone
							GO:0009651	response to salt stress
							GO:0042742	defense response to bacterium
AT1G32080	Pgl_GLEAN_10021397	XP_003547813.2	XP_004983525.1	AT1G32080	upregulate	0	GO:0010118	stomatal movement	Encodes a plant LrgAB/CidAB protein localized to the chloroplast envelope that is involved in chloroplast development, carbon partitioning, ABA/drought response, and leaf senescence. The gene may have evolved from gene fusion of bacterial lrgA and lrgB.	LrgB
							GO:0009737	response to abscissic acid
							GO:0042631	cellular response to water deprivation
							GO:0048527	lateral root development
AT3G05580	Pgl_GLEAN_10025523	XP_003521683.1	XP_002439316.1	AT3G05580	upregulate	0	GO:0048768	root hair cell tip growth	Encodes a Type One Protein Phosphatase that acts as a nucleocytoplasmic negative regulator of tip growth. Mutants affect pollen germination, pollen tube growth, and root hair growth. It acts genetically downstream of ANX1 (AT3G04690) and ANX2 (AT5G28680) and is functionally redundant with TOPP8 (AT5G27840).	TYPE ONE PROTEIN PHOSPHATASE 9 (TOPP9)
AT5G57560	Pgl_GLEAN_10038433	XP_004972507.1	XP_004966139.1	AT5G57560	upregulate	4.11e-138	GO:0042546	cell wall biogenesis	Encodes a cell wall-modifying enzyme, rapidly upregulated in response to environmental stimuli.	TOUCH 4 (TCH4)
							GO:0009612	response to mechanical stimulus
							GO:0009741	response to brassinosteroid
							GO:0009733	response to auxin
							GO:0071456	cellular response to hypoxia
							GO:0009409	response to cold
AT2G16430	Pgl_GLEAN_10020910	XP_004970155.1	XP_004970155.1	AT2G16430	downregulate	0	GO:0016036	cellular repsponse to phosphate starvation	Encodes an acid phosphatase involved plant acclimation to Pi deprivation.	PURPLE ACID PHOSPHATASE 10 (PAP10)
AT2G37710	Pgl_GLEAN_10023542	XP_004976332.1	XP_004976332.1	AT2G37710	downregulate	0	GO:0042742	defense response to bacterium
							GO:0002229	defense response to oomycetes
							GO:0009751	response to salicylic acid
AT3G14690	Pgl_GLEAN_10013237	BAL45199.1	XP_004969238.1	AT3G14690	upregulate	0	GO:0004497	monooxygenease activity
							GO:0009737	response to abscissic acid
							GO:0009966	regulation of signal transduction
AT4G11650	Pgl_GLEAN_10033680	XP_004982238.1	XP_004963269.1	AT4G11650	downregulate	1.59e-42	GO:0042742	defense response to bacterium	Osmotin-like protein; functions as a positive regulator in the generation of ABA responses and is under post-translational control	OSMOTIN 34 (OSM34)
AT5G24090	Pgl_GLEAN_10022544	XP_004955667.1	XP_004955668.1	AT5G24090	downregulate	1.09e-137	GO:0009651	response to salt stress	Chitinase A (class III) expressed exclusively under environmental stress conditions. Shown be a plant lysozyme involved in plant immunity.	CHITINASE A (CHIA)
							GO:0042631	cellular response to water deprivation
							GO:0009409	response to cold
							GO:0009611	response to wounding
							GO:0009642	response to light intensity
AT3G45780	Pgl_GLEAN_10001633	AAB41023.2	XP_004978416.1	AT3G45780	upregulate	0	GO:0009785	Blue light signaling pathway	Phosphorylation of serine851 in the activation loop of PHOT1 appears to be required for stomatal opening, chloroplast accumulation, leaf flattening, and phototropism, and phosphorylation of serine849 may also contribute to the regulation of these responses. Phosphorylation-dependent binding of 14-3-3 proteins to the Hinge1 region of PHOT1 appears to require serine350 and serine376.	PHOTOTROPIN 1 (PHOT1)
							GO:0009637	response to blue light
AT5G27660	Pgl_GLEAN_10026989	XP_002448704.1	XP_004978332.1	AT5G27660	downregulate	1.22e-152	GO:0034605	cellular response to heat	Encodes a protein with similarity to human PARK13, a mitochondrial protease implicated in Parkinson disease. DEG14 is induced by heat stress and involved in degradation of misfolded proteins.	DEGRADATION OF PERIPLASMIC PROTEINS 14 (DEG14)
AT3G18830	Pgl_GLEAN_10019669	XP_004507415.1	XP_004985339.1	AT3G18830	upregulate	0	GO:001031	lateral root formation	This gene encodes a plasma membrane-localized polyol/cyclitol/monosaccharide-H+-symporter. The symporter is able to catalyze the energy-dependent membrane passage of a wide range of linear polyols (three to six carbon backbone), of cyclic polyols (myo-inositol), and of numerous monosaccharides, including pyranose ring-forming and furanose ring-forming hexoses and pentoses. This gene belongs to a …	POLYOL/MONOSACCHARIDE TRANSPORTER 5 (PMT5)
AT5G61410	Pgl_GLEAN_10002011	AFK48856.1	XP_004985559.1	AT5G61410	upregulate	2.37e-151	GO:0009624	response to nematode	Arabidopsis thaliana ribulose-5-phosphate-3-epimerase mRNA	D-RIBULOSE-5-PHOSPHATE-3-EPIMERASE (RPE)
							GO:0009409	response to cold
AT5G20410	Pgl_GLEAN_10031058	XP_004954257.1	XP_004954257.1	AT5G20410	downregulate	0	GO:0006631	fatty acid metabolic process	Encodes a type B monogalactosyldiacylglycerol (MGDG) synthase. Strongly induced by phosphate deprivation, and in non-photosynthetic tissues. Does not contribute to galactolipid synthesis under Pi-sufficient conditions but does under Pi starvation.
							GO:0016036	cellular response to phosphate starvation
AT5G61510	Pgl_GLEAN_10021100	XP_004983656.1	XP_004986090.1	AT5G61510	downregulate	3.1e-159	GO:0016491	oxidoreductase activity
							GO:0009644	response to high light intensity
AT3G56970	Pgl_GLEAN_10027049	XP_004971295.1	XP_004971295.1	AT3G56970	downregulate	7.3e-31	GO:0010106	cellular response to iron ion starvation
AT3G45140	Pgl_GLEAN_10020461	XP_004973870.1	XP_004951582.1	AT3G45140	downregulate	0	GO:1901149	salicylic acid binding	Chloroplast lipoxygenase required for wound-induced jasmonic acid accumulation in Arabidopsis.Mutants are resistant to Staphylococcus aureus and accumulate salicylic acid upon infection. The mRNA is cell-to-cell mobile.	LIPOXYGENASE 2 (LOX2)
							GO:0010597	green leaf volatile biosynthetic process
							GO:0080027	response to herbivore
							GO:0016702	oxireducatse activity
							GO:0009695	jasmonic acid biosysnthetic process
							GO:0009611	response to wounding
							GO:0009753	response to jasmonic acid
							GO:0009617	response to bacterium
							GO:0009414	response to water deprivation
AT5G25880	Pgl_GLEAN_10027899	ESW32289.1	P_004969797.1	AT5G25880	upregulate	0	GO:0004470	malic enzyme activity	The malic enzyme (EC 1.1.1.40) encoded by the ATNADP-ME3 is presumably cytosolic and restricted in its expression by both developmental and cell-specific signals.	NADP-MALIC ENZYME 3 (NADP-ME3)
							GO:0006108	malate metabolic process
							GO:0004473	malate dehydrogenase activity
AT5G52450	Pgl_GLEAN_10016338	XP_002446251.1	XP_004983270.1	AT5G52450	upregulate	0	GO:0009624	response to nematode	MATE efflux family protein;(source:Araport11)
							GO:1990961	xenobiotic detoxification
AT3G04720	Pgl_GLEAN_10029185	XP_004979595.1	XP_004979595.1	AT3G04720	upregulate	1.9e-62	GO:0009627	systemic acquired resistance	Encodes a protein similar to the antifungal chitin-binding protein hevein from rubber tree latex. mRNA levels increase in response to ethylene and turnip crinkle virus infection. The mRNA is cell-to-cell mobile.	PATHOGENESIS-RELATED 4 (PR4)
							GO:0009723	response to ethylene
							GO:0009615	response to virus
							GO:0080027	response to herbivore
							GO:0080027	defense response to bacterium
AT2G07050	Pgl_GLEAN_10026807	AAT38890.1	ACN34222.1	AT2G07050	upregulate	0	GO:0016104	terpenoid biosysnthetic process	Involved in the biosynthesis of brassinosteroids. Catalyzes the reaction from epoxysqualene to cycloartenol.	CYCLOARTENOL SYNTHASE 1 (CAS1)
							GO:0005811	lipid droplet
AT3G54050	Pgl_GLEAN_10029347	AAK59929.1	XP_004984665.1	AT3G54050	upregulate	0	GO:0009409	response to cold	Encodes a chloroplastic fructose 1,6-bisphosphate phosphatase. also known as HCEF1 (High Cyclic Electron Flow 1). hcef1 mutants have constitutively elevated electron flow (CEFI) and plants with antisense suppression of this enzyme have higher levels of net leaf photosynthesis and increased sucrose biosynthesis. The mRNA is cell-to-cell mobile.	HIGH CYCLIC ELECTRON FLOW 1 (HCEF1)
AT5G45820	Pgl_GLEAN_10036265	BAK07613.1	EMT28985.1	AT5G45820	downregulate	0	GO:0009737	response to abscissic acid	Encodes a CBL-interacting serine/threonine protein kinase comprised of an N-terminal kinase catalytic domain similar to SNF1/AMPK and a unique C-terminal regulatory domain.	CBL-INTERACTING PROTEIN KINASE 20 (CIPK20)
AT3G12500	Pgl_GLEAN_10032140	XP_003629191.1	ACJ62121.1	AT3G12500	upregulate	7.68e-162	GO:0050832	defense response to fungus	encodes a basic chitinase involved in ethylene/jasmonic acid mediated signalling pathway during systemic acquired resistance based on expression analyses.	BASIC CHITINASE (HCHIB)
							GO:0009871	jasmonic acid and ethylene-dependent systemic resistance
AT1G16670	Pgl_GLEAN_10014515	XP_004951873.1	XP_002438847.1	AT1G16670	upregulate	1.4e-166	GO:0009625	response to insect	Encodes a cold-activated plasma membrane protein cold-responsive protein kinase that phosphorylates 14-3-3 proteins. The phosphorylated 14-3-3 proteins shuttle from the cytosol to the nucleus, where they interact with and destabilize the key cold-responsive C-repeat-binding factor (CBF) proteins, modulate CBF stability and the response to cold stress.	COLD-RESPONSIVE PROTEIN KINASE 1 (CRPK1)
							GO:0002237	response to molecule of bacterial origin
AT5G01220	Pgl_GLEAN_10037361	WP_007467967.1	XP_004987290.1	AT5G01220	downregulate	0	GO:0016036	cellular response to phosphate starvation
AT4G20260	Pgl_GLEAN_10019044	ACJ84038.1	XP_004967384.1	AT4G20260	upregulate	2.72e-33	GO:0009414	response to water deprivation	Encodes a Ca2+ and Cu2+ binding protein. N-terminal myristylation on glycine 2 appears to enable it to associate tightly with the plasma membrane. Recombinant PCaP1 interacts strongly with phosphatidylinositol 3,5-bisphosphate (PtdIns(3,5)P2) and PtdIns (3,4,5)P3, and weakly with PtdIns(3,5)P2 and PtdIns(4,5). It also interacts with calmodulin (CaM) in a calcium-dependent manner. CaM does not int…	PLASMA-MEMBRANE ASSOCIATED CATION-BINDING PROTEIN 1 (PCAP1)
							GO:0010350	cellular response to magnesium starvation
							GO:0071219	cellular response to bacterial origin
							GO:0071280	cellular response to copper ion
							GO:0071472	cellular response to salt stress
AT2G39050	Pgl_GLEAN_10007409	XP_004959898.1	XP_004967932.1	AT2G39050	downregulate	7.1e-71	GO:0042742	defense response to bacterium
AT3G57260	Pgl_GLEAN_10003749	ACU00675.1	XP_004971231.1	AT3G57260	downregulate	2.58e-94	GO:0009627	systemic acquired resistance	beta 1,3-glucanase	PATHOGENESIS-RELATED PROTEIN 2 (PR2)
AT5G42870	Pgl_GLEAN_10026852	XP_003589217.1	XP_008677957.1	AT5G42870	upregulate	2.93e-161	GO:0016036	cellular response to phosphate starvation	The PAH2 gene encodes a phosphatidate phosphohydrolase. Mutant analysis revealed its involvement in galactolipid synthesis pathway, and the membrane lipid remodeling.	PHOSPHATIDIC ACID PHOSPHOHYDROLASE 2
							GO:0044255	cellular lipd metabolic process
AT5G24530	Pgl_GLEAN_10000809	XP_003602395.1	XP_004985921.1	AT5G24530	upregulate	2.02e-165	GO:0042742	defense response to bacterium	Encodes a putative 2OG-Fe(II) oxygenase that is defense-associated but required for susceptibility to downy mildew. The mRNA is cell-to-cell mobile	DOWNY MILDEW RESISTANT 6 (DMR6)
							GO:0009620	response to fungus
							GO:0002229	defense response to oomycetes
							GO:0009751	response to salicylic acid
							GO:0071456	cellular response to hypoxia
							GO:0010150	leaf senescence
AT4G23180	Pgl_GLEAN_10006695	XP_004953651.1	XP_004957928.1	AT4G23180	downregulate	0	GO:0042742	defense response to bacterium
AT4G02380	Pgl_GLEAN_10028629	XP_004962326.1	XP_004967515.1	AT4G02380	upregulate	4.47e-15	GO:0009414	response to water deprivation	Encodes AtLEA5 (late embryogenesis abundant like protein). Also known as SENESCENCE-ASSOCIATED GENE 21 (SAG21). Has a role on oxidative stress tolerance. mRNA levels are elevated in response to various stresses.	SENESCENCE-ASSOCIATED GENE 21 (SAG21)
							GO:0009737	response to abscissic acid
							GO:0009646	response to absence of light
							GO:0042631	cellular response to water deprivation
							GO:0009409	response to cold
							GO:0000302	response to ROS
							GO:0009625	response to insect
							GO:0006979	response to oxidative stress
							GO:0010150	leaf senescence
							GO:0009723	response to ethylene
							GO:0009416	respnse to light stimulus
AT1G79460	Pgl_GLEAN_10012752	AAT49066.1	XP_004956313.1	AT1G79460	upregulate	0	GO:0009686	diterpenoid biosynthetic process	Encodes for a protein with ent-kaurene synthase B activity which catalyzes the second step in the cyclization of GGPP to ent-kaurene in the gibberellins biosynthetic pathway.	GA REQUIRING 2 (GA2)
							GO:0009686	gibberellic acid mediated signaling pathway
							GO:0016102	diterpenoid biosynthetic process
							GO:0010333	terpene sythase activity
AT5G10230	Pgl_GLEAN_10012413	XP_004953954.1	XP_004953954.1	AT5G10230	downregulate	9.14e-135	GO:0009409	response to cold	Encodes a calcium-binding protein annexin (AnnAt7).	ANNEXIN 7 (ANNAT7)
							GO:0009408	response to heat
							GO:0009651	response to salt stress
							GO:0009414	response to water deprivation
AT3G46970	Pgl_GLEAN_10032453	AAM29154.1	XP_004970602.1	AT3G46970	upregulate	0	GO:0009414	response to water deprivation	Encodes a cytosolic alpha-glucan phosphorylase. In vitro, the enzyme has a preference for branched polysaccharides, such as glycogen.	ALPHA-GLUCAN PHOSPHORYLASE 2 (PHS2)
AT1G32060	Pgl_GLEAN_10017930	XP_004512451.1	XP_004953549.1	AT1G32060	upregulate	0	GO:0009409	response to cold	phosphoribulokinase;	PHOSPHORIBULOKINASE (PRK)
AT2G03200	Pgl_GLEAN_10020803	XP_004503002.1	XP_008659134.1	AT2G03200	upregulate	5.17e-142	GO:0005576	extracellular region	Atypical aspartic protease which modulates lateral root development.
							GO:0008233	peptidase activity
AT3G14470	Pgl_GLEAN_10013038	XP_004951267.1	XP_004966537.1	AT3G14470	upregulate	5.88e-150	GO:0006952	defense response	NB-ARC domain-containing disease resistance protein;
							GO:0005576	extracellular region
							GO:0005515	protein binding
							GO:0043531	ADP binding
AT5G55180	Pgl_GLEAN_10031595	DAA62892.1	XP_004966537.1	AT5G55180	downregulate	4.01e-180	GO:0009507	Chloroplast	O-Glycosyl hydrolases family 17 protein;
							GO:0009611	response to wounding
							GO:0009753	response to jasmonic acid
							GO:0006970	response to osmotic stress
							GO:0005975	carbohydrate metabolic process
							GO:0009414	response to water deprivation
							GO:0019748	secondary metabolic process
							GO:0009737	response to abscissic acid
AT1G15910	Pgl_GLEAN_10030568	XP_004968205.1	XP_004968205.1	AT1G15910	upregulate	1.95e-172	GO:0010569	regulation of DNA break repair	Belongs to a subgroup of SGS3-like proteins that act redundantly in RNA-directed DNA methylation:
AT5G67390	Pgl_GLEAN_1001891	XP_004979789.1	XP_004979789.1	AT5G67390	upregulate	1.65e-14	GO:0071482	response to light stimulus	glycosyltransferase-like protein
AT5G62670	Pgl_GLEAN_10008446	AAD46187.1	XP_002459489.1	AT5G62670	downregulate	0	GO:0051453	regulation of intercellular pH	H[+]-ATPase 11;
AT5G46910	Pgl_GLEAN_10017937	AFW72911.1	XP_004983538.1	AT5G46910	upregulate	0	GO:0048577	response to abiotic stimuli	H3K27me3 demethylase involved in temperature and photoperiod dependent repressing of flowering.
AT1G59960	Pgl_GLEAN_10020797	XP_004975755.1	XP_002467392.1	AT1G59960	upregulate	5.57e-113	GO:0010035	response to inorganic substance	NAD(P)-linked oxidoreductase superfamily protein;
AT1G08570	Pgl_GLEAN_10015213	XP_004984516.1	XP_004958724.1	AT1G08570	downregulate	7.88e-105	GO:0009642	response to light stimulus	Encodes a member of the thioredoxin family protein. Located in the chloroplast. Shows high activity towards the chloroplast 2-Cys peroxiredoxin A, and poor activity towards the chloroplast NADP-malate dehydrogenase. The mRNA is cell-to-cell mobile.
							GO:0006970	response to osmotic stress
AT1G68660	Pgl_GLEAN_10034722	AFK41868.1	XP_004973504.1	AT1G68660	downregulate	2.64e-72	GO:1903052	positive regulation of proteolysis	ClpS1 is a member of the caseionolytic proteinase S family of N-recognins. It is involved in proteolysis in the chloroplast stroma. An arginine residue (Arg50) controls low-affinity substrate binding.
AT4G21510	Pgl_GLEAN_10015794	EMJ13340.1	NP_001267740.1	AT4G21510	downregulate	2.78e-16	GO:0009642	response to light intensity	F-box family protein; mutant is hypersensitive to salt stress.
							GO:0071310	cellular response to organic substance
							GO:1901701	cellular response to oxygen containing compound
AT1G76140	Pgl_GLEAN_10010819	XP_002446934.1	XP_004956126.1	AT1G76140	downregulate	0	GO:0010035	response to inorganic substance	Putative prolyl oligopeptidase.
AT1G50900	Pgl_GLEAN_10037066	XP_003598690.1	XP_004957877.1	AT1G50900	upregulate	1.11e-65	GO:0009570	chloroplast stroma	Encodes GDC1 (Grana Deficient Chloroplast 1), an ankyrin domain containing protein required fro chloroplast thylakoid grana formation. The mRNA is cell-to-cell mobile.
AT1G14220	Pgl_GLEAN_10034700	NP_001274161.1	NP_001274161.1	AT1G14220	upregulate	5.32e-96	GO:0006401	RNA catabolic process	Ribonuclease T2 family protein;
AT3G15820	Pgl_GLEAN_10024916	XP_004965925.1	XP_004965925.1	AT3G15820	downregulate	1.86e-82	GO:0004142	diacylglycerol cholinephosphotransferase activity	Functions as phosphatidylcholine:diacylglycerol cholinephosphotransferase, a major reaction for the transfer of 18:1 into phosphatidylcholine for desaturation and also for the reverse transfer of 18:2 and 18:3 into the triacylglycerols synthesis pathway
AT5G25930	Pgl_GLEAN_10030191	XP_004969910.1	XP_004969910.1	AT5G25930	downregulate	0	GO:0010035	response to inorganic substance	LRR transmembrane receptor kinase. Binds SCREW phyotocytokine signaling peptides during plant immune response.
							GO:0009737	response to abscissic acid
							GO:0009755	hormone mediated signaling pathway
		re					GO:0006979	response to oxidative stress
							GO:0009751	responses to salicylic acid
AT3G48280	Pgl_GLEAN_10003466	XP_004972413.1	XP_004972412.1	AT3G48280	downregulate	2.46e-128	GO:0009416	response to light stimulus	putative cytochrome P450
AT3G17700	Pgl_GLEAN_10031605	XP_003534111.1	XP_002452903.1	AT3G17700	downregulate	0	GO:0009624	response to nematode	cyclic nucleotide-binding transporter 1, member of a family of cyclic nucleotide gated channels. The mRNA is cell-to-cell mobile.
							GO:0071310	cellular response to organic substance
							GO:0033993	response to lipid
							GO:0009611	response to wounding
AT5G67360	Pgl_GLEAN_10009708	XP_003550312.1	XP_004981675.1	AT5G67360	upregulate	0	GO:0004252	serine-type endopaptidase activity	Encodes a subtilisin-like serine protease essential for mucilage release from seed coats.
AT5G18640	Pgl_GLEAN_10011237	XP_004486050.1	XP_004984394.1	AT5G18640	upregulate	8.46e-146	GO:0005576	extracellular region	alpha/beta-Hydrolases superfamily protein;
							GO:0006629	lipid metabolic process
AT3G03050	Pgl_GLEAN_10006663	XP_004964325.1	XP_004972774.1	AT3G03050	downregulate	0	GO:0009409	response to cold	encodes a cellulose synthase like protein. mutations initiate root hairs that rupture at their tip soon after initiation. is required for the synthesis of a noncellulosic wall polysaccharide.
AT1G65480	Pgl_GLEAN_10026038	XP_004968639.1	AFW75584.1	AT1G65480	upregulate	4.89e-96	GO:0010119	regulation of stomatal movement	FT, together with LFY, promotes flowering and is antagonistic with its homologous gene, TERMINAL FLOWER1 (TFL1). Together with TSF, it plays an antagonistic role to TFL1 in the determination of inflorescence meristem identity. FT is expressed in leaves and is induced by long day treatment. Either the FT mRNA or protein is translocated to the shoot apex where it induces its own expression. Recent …
AT1G05805	Pgl_GLEAN_10008692	XP_004970931.1	XP_004970931.1	AT1G05805	upregulate	1.76e-47	GO:1902456	regulation os stomatal opening	basic helix-loop-helix (bHLH) DNA-binding superfamily protein;
							GO:0009416	respnse to light stimulus
AT5G17920	Pgl_GLEAN_10016462	XP_004982263.1	XP_008662311.1	AT5G17920	downregulate	0	GO:0010043	response to zinc ion	Encodes a cytosolic cobalamin-independent methionine synthase, involved in methionine regeneration via the activated methyl cycle (SAM cycle). The protein undergoes thiolation following treatment with the oxidant tert-butylhydroperoxide. The mRNA is cell-to-cell mobile.
AT5G17230	Pgl_GLEAN_10032112	DAA34969.1	XP_004957595.1	AT5G17230	downregulate	0	GO:0004311	transferase actvity	Encodes phytoene synthase that is the rate-limiting enzyme in the carotenoid biosynthetic pathway and that interacts with the ORANGE (OR) protein. PSY's expression is posttransciptionally regulated by OR.
							GO:0016117	carotenoid biosynthetic process
AT2G46660	Pgl_GLEAN_10005046	XP_003627517.1	XP_004959619.1	AT2G46660	upregulate	6.25e-134	GO:0016705	oxidoreducatse activity	Encodes a member of CYP78A cytochrome P450 monooxygenase protein family that is required in the sporophytic tissue of the mother plant to promote seed growth.
AT2G04270	Pgl_GLEAN_10011654	NP_001061542.1	XP_004973211.1	AT2G04270	upregulate	1.35e-101	GO:0009507	Chloroplast	Similar to E.coli endoribonuclease E. Functions as a ribonuclease, is located in the chloroplast, and is involved in chloroplast development. Loss of function mutants are white and arrest at the cotyledon stage. The phenotype is rescued by providing sucrose.
AT5G47900	Pgl_GLEAN_10007290	XP_004979419.1	XP_004975514.1	AT5G47900	upregulate	1.42e-179	GO:0009416	respnse to light stimulus	heparan-alpha-glucosaminide N-acetyltransferase-like protein (DUF1624);
AT5G58320	Pgl_GLEAN_10028925	XP_004960793.1	XP_004968322.1	AT5G58320	downregulate	1.16e-64	GO:0009414	response to water deprivation	Encodes a member of the NET superfamily of proteins that potentially couples different membranes to the actin cytoskeleton in plant cells. It colocalizes with filamentous actin and is localized to the tonoplast membrane. It is expressed in the epidermis of the root meristem and the early expansion zone.
							GO:0009737	response to abscissic acid
							GO:0006970	response to osmotic stress
AT5G20550	Pgl_GLEAN_10029466	XP_004964706.1	XP_004964706.1	AT5G20550	downregulate	9.21e-93	GO:0090558	palnt epidermis development	2-oxoglutarate (2OG) and Fe(II)-dependent oxygenase superfamily protein;
AT5G48150	Pgl_GLEAN_10010899	XP_004957943.1	XP_004957943.1	AT5G48150	downregulate	0	GO:1990110	response to stress	Member of GRAS gene family. Semi-dominant mutant has a reduced response to far-red light and appears to act early in the phytochrome A signaling pathway.
							GO:0009640	photomorphogenesis
							GO:0009585	response to abiotic stimuli
AT1G13440	Pgl_GLEAN_10000341	XP_004502328.1	XP_004953003.1	AT1G13440	upregulate	0	GO:0046686	response to cadmium ion	The expression level of GAPC-2 is upregulated in Arabidopsis seedlings exposed to cadmium.
AT1G32260	Pgl_GLEAN_10000042	EAY84315.1	XP_004952028.1	AT1G32260	downregulate	1.69e-59	GO:0007165	signal transduction	envelope glycoprotein;
AT5G62740	Pgl_GLEAN_10014726	XP_004961021.1	NP_001061744.1	AT5G62740	downregulate	0	GO:0010035	response to inorganic substance	SPFH/Band 7/PHB domain-containing membrane-associated protein family
AT1G26820	Pgl_GLEAN_10034700	XP_004957484.1	XP_004957484.1	AT1G26820	downregulate	8.46e-97	GO:0007568	aging	Encodes ribonuclease RNS3.
AT3G18000	Pgl_GLEAN_10036375	XP_004961340.1	XP_004961340.1	AT3G18000	upregulate	0	GO:0006656	lipid metabolic process	AT3G18000
							GO:0010183	response to external stimulus
AT3G24090	Pgl_GLEAN_10033203	XP_004978442.1	XP_004978442.1	AT3G24090	downregulate	0	GO:0034976	response to endoplasmic reticulum stress	Encodes a glutamine-fructose-6-phosphate transaminase that likely plays a role in UDP-N-acetylglucosamine biosynthesis
AT5G11880	Pgl_GLEAN_10006329	NP_056962.2	XP_004963066.1	AT5G11880	upregulate	0	GO:0008836	catalytic activity	Meso-diaminopimelate decarboxylase which catalyzes the decarboxylation of mesodiaminopimelate, the final reaction in the diaminopimelate L-lysine biosynthetic pathway.
AT3G56040	Pgl_GLEAN_10026661	EMS56381.1	XP_008656383.1	AT3G56040	upregulate	0	GO:0003977	transferase actvity	UDP-glucose pyrophosphorylase 3;
AT2G17120	Pgl_GLEAN_10030769	XP_004985817.1	XP_004985817.1	AT2G17120	upregulate	1.66e-46	GO:0009966	regulation of signal transduction	Induction of chitin-responsive genes by chitin treatment is not blocked in the mutant. It contains a C-terminal GPI anchor signal and is an ortholog of OsCEBiP.
							GO:0050832	defense response to fungus
							GO:0002376	immune system process
							GO:0009751	response to salicylic acid
AT3G22270	Pgl_GLEAN_10007166	XP_004970101.1	XP_004970101.1	AT3G22270	downregulate	0	GO:0005515	protein binding	Topoisomerase II-associated protein PAT1;
							GO:0019827	stem cell population maintainence
AT5G53300	Pgl_GLEAN_10031905	NP_001054191.1	XP_004960630.1	AT5G53300	downregulate	8.05e-106	GO:0006511	ubiguitn protein ligase binidng and catabolic process	Encodes a ubiquitin conjugating enzyme.
AT2G43180	Pgl_GLEAN_10018337	XP_004976149.1	XP_004975394.1	AT2G43180	downregulate	3.95e-170	GO:0009507	Chloroplast	Phosphoenolpyruvate carboxylase family protein;
AT5G12470	Pgl_GLEAN_10027068	XP_004505639.1	XP_004962204.1	AT5G12470	upregulate	2.21e-152	GO:0015995	Chlorophyll biosysnthetic process	UvrABC system C protein, putative (DUF3411);
							GO:0010035	response to inorganic substance
AT4G10850	Pgl_GLEAN_10022634	NP_001168479.1	XP_004952305.1	AT4G10850	upregulate	4.87e-93	GO:0008643	crabohydrate transport	Nodulin MtN3 family protein;
AT3G01120	Pgl_GLEAN_10024843	AGA60137.1	XP_004984247.1	AT3G01120	upregulate	0	GO:0102028	transferase actvity	encodes a cystathionine gamma-synthase, which performs the first committed step in methionine biosynthesis. A conserved motif of 13 amino acids in the first exon is required for posttranscriptional autoregulation. This enzyme shares the same substrate as threonine synthase (TS) and its absence transcriptionally affects 8 genes in the genome.
AT1G65680	Pgl_GLEAN_10009578	XP_004973027.1	XP_004982324.1	AT1G65680	downregulate	2.7e-95	GO:0009828	plant-type cell wall loosening	member of BETA-EXPANSINS.
